# Supplementary material
Source: PubMed Central journal article supplement (PMC2872407)
Supplement: 1000261107_pnas.1000261107_SI.pdf [file 1000261107_pnas.1000261107_SI.pdf]

# Supporting Information

Goel et al. 10.1073/pnas.1000261107

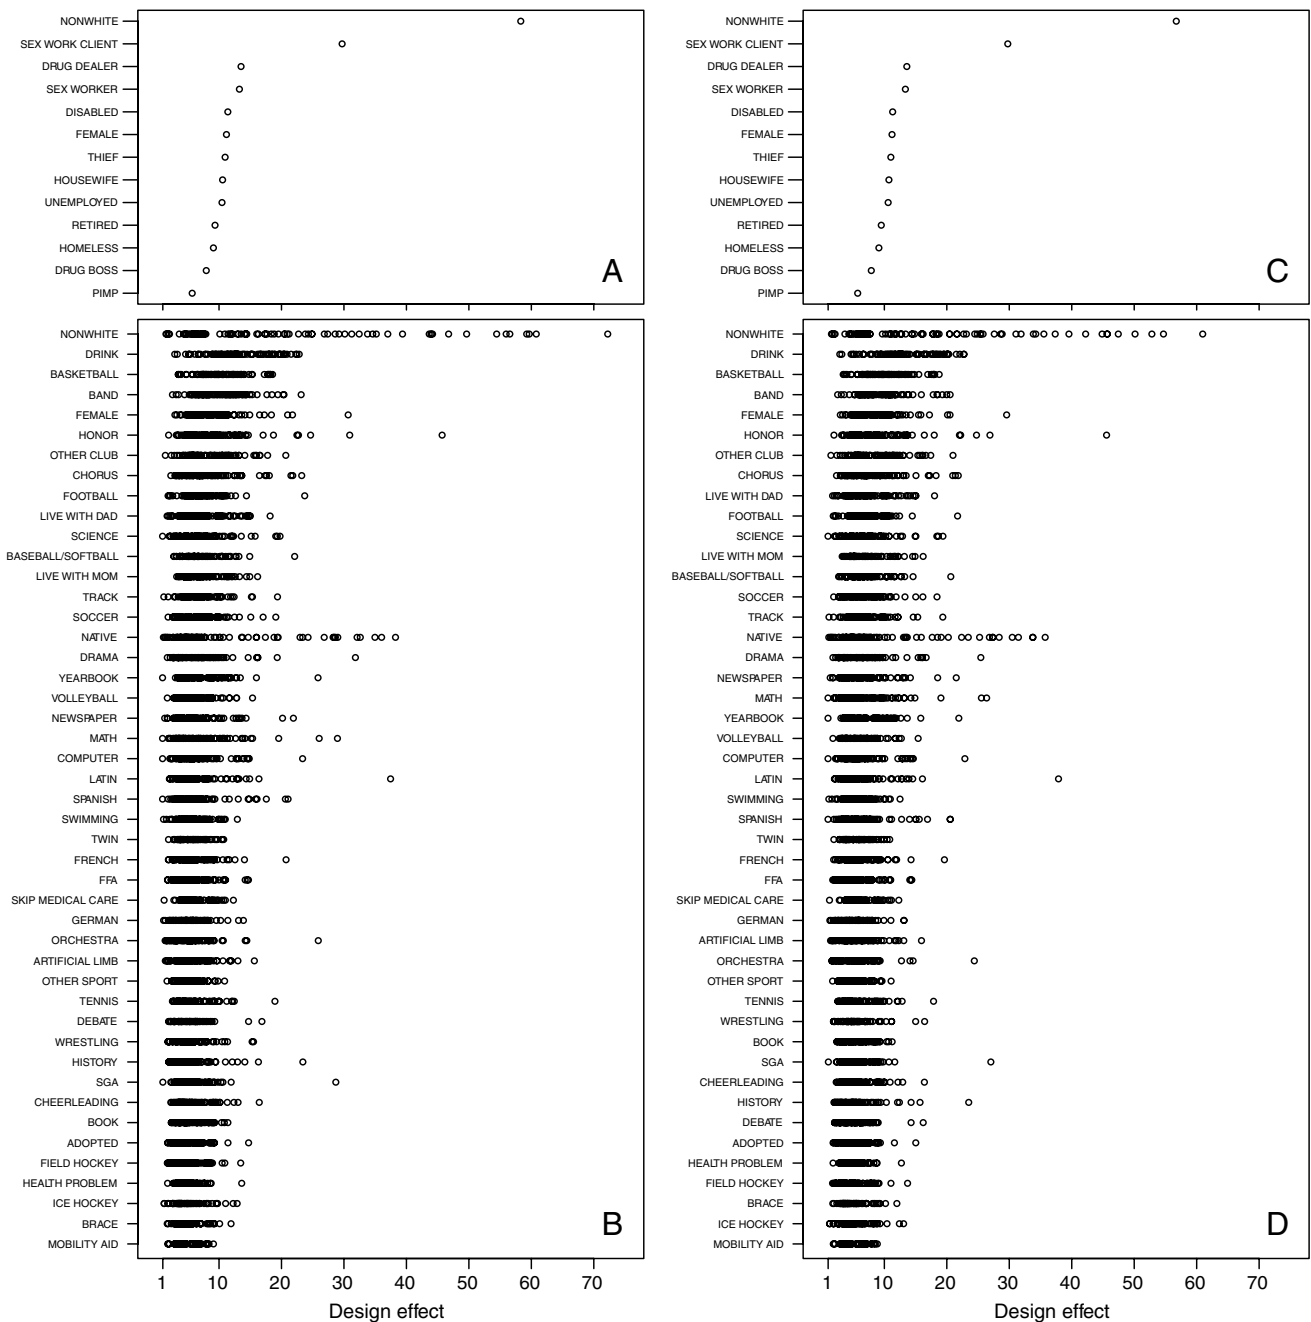

**Fig. S1.** Design effects for the current, respondent-driven sampling (RDS) II estimator (A and B) and the earlier, RDS I estimator (C and D) in Project 90 and Add Health. The median design effect for both estimators is 11.0 in Project 90 and 5.9 in Add Health. (RDS I and RDS II also produced nearly identical point estimates: Estimates were within one percentage point of one another in 95% of the Project 90 samples and in 97% of the Add Health samples.)

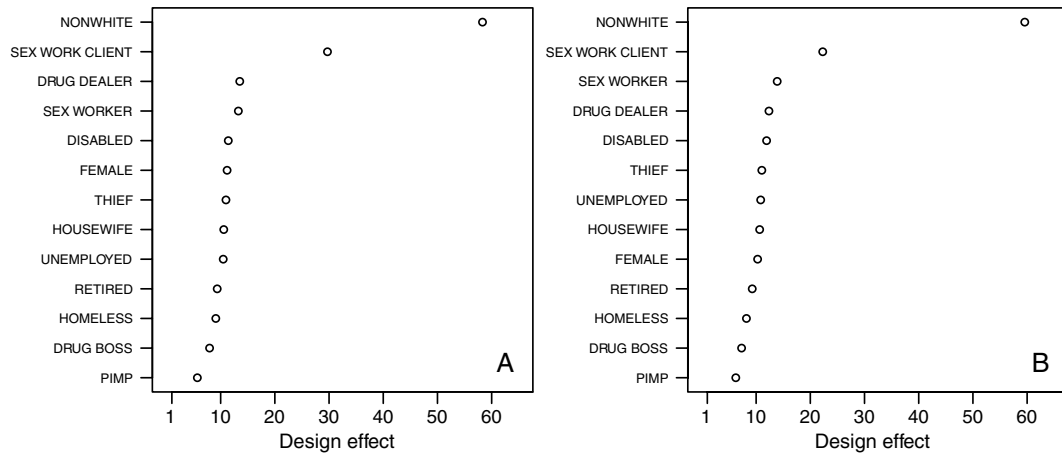

**Fig. 52.** Design effects for the original Project 90 network (A) and the subnetwork where leaves have been removed (B). Median design effects for the original network (11.0) and the subnetwork without leaves (10.8) are comparable.

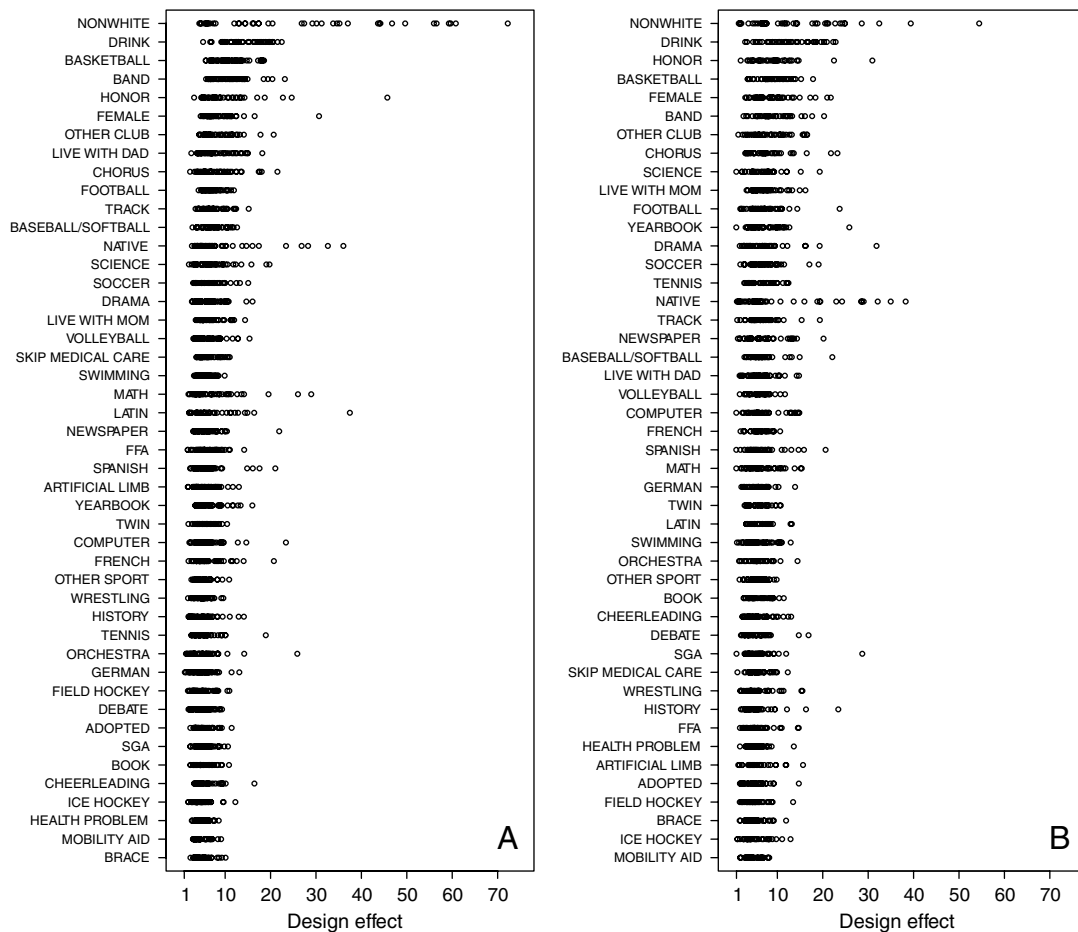

**Fig. 53.** Design effects in Add Health for schools that are joint middle and high schools (A) and those that are strictly high schools (B). The median design effect for joint schools (5.9) is approximately the same as in those that are exclusively high schools (6.0).



**Table S1. Studies that compare RDS estimates to those obtained via other methods**

| Study population | Location           | Alternative methodology             | Citation |
|------------------|--------------------|-------------------------------------|----------|
| IDU              | Barnaul, Russia    | Indigenous field worker sample      | (1)      |
| IDU              | Volgograd, Russia  | Indigenous field worker sample      | (1)      |
| IDU              | Detroit, USA       | Time-location sampling              | (2)      |
| IDU              | Houston, USA       | Time-location sampling              | (2)      |
| IDU              | New Orleans, USA   | Time-location sampling              | (2)      |
| IDU              | Seattle, USA       | Targeted and venue-based sampling   | (3)      |
| DU               | New York City, USA | Targeted and venue-based sampling   | (4)      |
| MSM              | Fortaleza, Brazil  | Snowball and time-location sampling | (5)      |
| MSM              | Tallinn, Estonia   | Internet convenience sampling       | (6)      |
| Latino gay men   | Chicago, USA       | Simulated time-location sampling    | (7)      |
| Latino gay men   | San Francisco, USA | Simulated time-location sampling    | (7)      |

IDU indicates injection drug users; MSM indicates men who have sex with men; and DU indicates drug users.

- 1 Platt L, et al. (2006) Methods to recruit hard-to-reach groups: Comparing two chain referral sampling methods of recruiting injection drug users across nine studies in Russia and Estonia. *J Urban Health* 83:39–53.
- 2 Robinson WT, et al. (2006) Recruiting injection drug users: A three-site comparison of results and experiences with respondent-driven and targeted sampling procedures. *J Urban Health* 83:29–38.
- 3 Burt RD, Hagan H, Sabin K, Thiede H (2010) Evaluating respondent-driven sampling in a major metropolitan area: Comparing injection drug users in the 2005 Seattle area National HIV Behavioral Surveillance System with injectors in the RAVEN and Kiwi studies. *Ann Epidemiol* 20:159–167.
- 4 Abdul-Quader AS, et al. (2006) Effectiveness of respondent-driven sampling for recruiting drug users in New York City: Findings from a pilot study. *J Urban Health* 83:459–476.
- 5 Kendall C, et al. (2008) An empirical comparison of respondent-driven sampling, time location sampling, and snowball sampling for behavioral surveillance in men who have sex with men, Fortaleza, Brazil. *AIDS Behav* 12:97–104.
- 6 Johnston LG, Trummal A, Lohmus L, Ravalepik A (2009) Efficacy of convenience sampling through the internet versus respondent driven sampling among males who have sex with males in Tallin and Harju County, Estonia: Challenges reaching a hidden population. *AIDS Care* 21:1195–1202.
- 7 Ramirez-Valles J, Heckathorn DD, Vázquez R, Diaz RM, Campbell RT (2005) From networks to populations: The development and application of respondent-driven sampling among IDUs and Latino gay men. *AIDS Behav* 9:387–402.
